# Supplementary material
Source: publisher figshare collection journal article supplement (https://geolsoc.figshare.com/ndownloader/files/21445185)
Supplement: Supplementary file 1 [file 21445185]

## Sheet: PC03_data
supplementary data3: AMS data of PC11
Km = mean susceptibility Kmax = maximum susceptibility, Kint = intermediate susceptibility, Kmin = minimum susceptibility. L = Kmax/Kint, F = Kint/Kmin, P′ = exp (√{2[η1 – ηm]2 + (η2 – ηm)2 + (η3 – ηm)2})) whereη1 = ln Kmax,η2 = ln Kint,η3 = ln Kmin, andηm= (η1 + η2 + η3)/3. Kmax Dec: Kmax declination, Kmax Inc: Kmax inclination, Kint Dec: Kint declination Kint Inc: Kint inclination, Kmin Dec: Km…
Kmax, Kint, Kmin directions are re-orientated a mean Paleomagnetic data of PC11 (Inc/dec=36.8/307.6, alf95=1.18, number=207)
SampleID	Total Deph.(cm)	Vol	Km	Kmax	Kint	Kmin	L	F	P'	T	Kmax Dec(°)	Kmax Inc(°)	Kint Dec(°)	Kint Inc(°)	Kmin Dec(°)	Kmin Inc(°)
S2-1	2.25	7	0.0003671	0.000374222	0.000370734	0.000356344	1.00941	1.04038	1.053	0.615	142.43	4	52.43	0	320.43	86
S2-2	4.5	7	0.0004193	0.000429782	0.000424751	0.000403325	1.01184	1.05312	1.07	0.629	157.43	1	67.43	3	269.43	87
S2-3	6.75	7	0.0004428	0.000455021	0.000449929	0.00042345	1.01132	1.06253	1.08	0.689	313.43	2	223.43	7	60.43	83
S2-4	9	7	0.0005012	0.00051388	0.000510923	0.000478746	1.00579	1.06721	1.082	0.837	307.43	1	217.43	5	52.43	85
S2-5	11.25	7	0.0007405	0.000754199	0.000748868	0.000718433	1.00712	1.04236	1.054	0.709	142.43	0	232.43	1	408.43	89
S2-6	13.5	7	0.00072	0.0007272	0.000723168	0.000709632	1.00558	1.01907	1.026	0.541	83.43	2	173.43	7	336.43	82
S2-7	15.75	7	0.0007975	0.00080715	0.000806113	0.000779237	1.00129	1.03449	1.041	0.929	135.43	5	405.43	5	272.43	83
S2-8	18	7	0.0007343	0.000740835	0.000735842	0.000726223	1.00679	1.01325	1.02	0.323	90.43	5	358.43	20	194.43	69
S2-9	20.25	7	0.000655	0.000660698	0.000657096	0.000647271	1.00548	1.01518	1.022	0.471	277.43	9	186.43	7	59.43	79
S2-10	22.5	7	0.0006259	0.000633786	0.000632284	0.000611629	1.00238	1.03377	1.041	0.868	117.43	2	207.43	3	346.43	86
S2-11	24.75	7	0.0006026	0.000613688	0.000610494	0.000583618	1.00523	1.04605	1.057	0.794	87.43	1	177.43	3	345.43	87
S2-12	27	7	0.0006184	0.000626625	0.000624955	0.000603682	1.00267	1.03524	1.042	0.857	288.43	2	378.43	0	115.43	88
S2-13	29.25	7	0.0006143	0.000625542	0.000622286	0.000595072	1.00523	1.04573	1.056	0.794	101.43	0	371.43	1	212.43	89
S2-14	31.5	7	0.0006144	0.000632832	0.000629514	0.000580854	1.00527	1.08377	1.101	0.876	281.43	0	191.43	2	372.43	88
S2-15	33.75	7	0.0006113	0.000630128	0.000627744	0.000576028	1.0038	1.08978	1.107	0.915	109.43	0	199.43	0	339.43	89
S2-16	36	7	0.0006242	0.000643425	0.000637371	0.000591804	1.0095	1.077	1.096	0.775	302.43	4	212.43	3	86.43	85
S2-17	38.25	7	0.0006443	0.000665497	0.000663114	0.000604289	1.00359	1.09735	1.116	0.926	282.43	2	372.43	0	106.43	88
S2-18	40.5	7	0.000567	0.00058333	0.000583103	0.000534568	1.00039	1.09079	1.106	0.992	177.43	4	267.43	4	405.43	84
S2-19	42.75	7	0.0005388	0.000556527	0.00055324	0.000506688	1.00594	1.09188	1.111	0.874	245.43	3	155.43	1	402.43	87
S2-20	45	7	0.0004902	0.000505641	0.000504612	0.000460347	1.00204	1.09616	1.113	0.956	233.43	5	323.43	1	62.43	85
S2-21	47.25	7	0.0004671	0.000482421	0.000480599	0.00043828	1.00379	1.09656	1.115	0.922	176.43	4	267.43	5	408.43	84
S2-22	49.5	7	0.0004578	0.000472129	0.00046897	0.000432301	1.00674	1.08482	1.103	0.849	335.43	0	245.43	2	76.43	88
S2-23	51.75	7	0.0004388	0.000452227	0.000449594	0.000414578	1.00586	1.08446	1.102	0.864	348.43	1	258.43	4	92.43	86
S2-24	54	7	0.0004007	0.000411799	0.000411399	0.000378902	1.00097	1.08577	1.1	0.977	351.43	3	261.43	1	154.43	87
S2-25	56.25	7	0.0003892	0.000398502	0.000396673	0.000372425	1.00461	1.06511	1.079	0.865	357.43	3	267.43	3	125.43	86
S2-26	58.5	7	0.0002778	0.000285995	0.000282023	0.00026541	1.01408	1.06259	1.083	0.625	315.43	4	405.43	3	171.43	85
S2-27	60.75	7	0.0003019	0.000308481	0.000307696	0.000289522	1.00255	1.06277	1.074	0.919	330.43	11	61.43	8	187.43	76
S2-28	63	7	0.0004499	0.000459483	0.000457908	0.000432309	1.00344	1.05921	1.071	0.887	371.43	5	281.43	2	167.43	85
S2-29	65.25	7	0.0004565	0.00046531	0.000461567	0.000442668	1.00811	1.04269	1.055	0.678	237.43	0	327.43	7	144.43	83
S2-30	67.5	7	0.0004677	0.000475604	0.000471442	0.000456054	1.00883	1.03374	1.045	0.583	286.43	2	376.43	1	126.43	87
S2-31	69.75	7	0.0004954	0.000503277	0.00050189	0.000481033	1.00276	1.04336	1.052	0.879	329.43	5	59.43	3	180.43	85
S2-32	72	7	0.000495	0.000502722	0.000499851	0.000482427	1.00574	1.03612	1.046	0.725	74.43	0	344.43	4	164.43	86
S2-33	74.25	7	0.0004368	0.000446846	0.000442959	0.000420595	1.00878	1.05317	1.068	0.713	357.43	8	87.43	1	184.43	82
S2-34	76.5	7	0.000431	0.000438068	0.000430655	0.000424276	1.01721	1.01504	1.033	-0.065	189.43	8	284.43	28	84.43	61
S3-1	79.2614	7	0.0004086	0.000416854	0.000409499	0.000399407	1.01796	1.02527	1.044	0.167	240.43	3	331.43	16	141.43	74
S3-2	81.5227	7	0.0004534	0.000462513	0.000455667	0.000441974	1.01502	1.03098	1.047	0.344	66.43	3	336.43	0	239.43	87
S3-3	83.7841	7	0.0004436	0.000452738	0.000440983	0.000437079	1.02666	1.00893	1.037	-0.496	198.43	7	100.43	49	294.43	40
S3-4	86.0455	7	0.000454	0.000460492	0.000456906	0.000444602	1.00785	1.02767	1.038	0.554	254.43	3	164.43	0	64.43	87
S3-5	88.3068	7	0.000456	0.000462703	0.000459922	0.000445375	1.00605	1.03266	1.042	0.68	85.43	3	355.43	3	221.43	86
S3-6	90.5682	7	0.0004538	0.000459473	0.000456205	0.000445722	1.00716	1.02352	1.032	0.528	128.43	2	218.43	4	371.43	86
S3-7	92.8295	7	0.0004429	0.000448746	0.00044693	0.000433023	1.00406	1.03212	1.04	0.771	79.43	4	169.43	1	277.43	86
S3-8	95.0909	7	0.0004742	0.000482214	0.000479132	0.000461207	1.00643	1.03887	1.049	0.71	211.43	7	301.43	3	57.43	82
S3-9	97.3523	7	0.0004915	0.000500544	0.000495727	0.000478229	1.00972	1.03659	1.049	0.576	252.43	6	342.43	5	115.43	82
S3-10	99.6136	7	0.0004694	0.000476582	0.000471184	0.000460434	1.01146	1.02335	1.036	0.339	284.43	8	376.43	16	168.43	72
S3-11	101.875	7	0.000432	0.000441763	0.000432259	0.000421934	1.02199	1.02447	1.047	0.054	385.43	3	115.43	0	212.43	86
S3-12	104.136	7	0.0003673	0.000376409	0.000374279	0.000351249	1.00569	1.06557	1.08	0.835	321.43	3	231.43	2	108.43	86
S3-13	106.398	7	0.0004315	0.000440259	0.000439483	0.000414758	1.00177	1.05961	1.07	0.94	76.43	3	346.43	5	195.43	84
S3-14	108.659	7	0.0004699	0.000477183	0.000473424	0.000459092	1.00794	1.03122	1.042	0.594	402.43	4	312.43	6	165.43	83
S3-15	110.92	7	0.0004982	0.000506919	0.000503232	0.00048445	1.00733	1.03877	1.05	0.68	68.43	0	338.43	2	172.43	88
S3-16	113.182	7	0.0005093	0.000517602	0.000516023	0.000494276	1.00306	1.044	1.053	0.867	319.43	5	409.43	2	165.43	84
S3-17	115.443	7	0.0005355	0.00054455	0.000539998	0.000521952	1.00843	1.03457	1.046	0.603	401.43	2	311.43	1	208.43	87
S3-18	117.705	7	0.000587	0.000594983	0.00059287	0.000573147	1.00356	1.03441	1.042	0.808	375.43	2	284.43	5	123.43	84
S3-19	119.966	7	0.0005878	0.000595912	0.000588329	0.000579159	1.01289	1.01583	1.029	0.104	148.43	5	241.43	34	412.43	55
S3-20	122.227	7	0.0006107	0.000620288	0.000608135	0.000603738	1.01998	1.00728	1.028	-0.464	235.43	0	325.43	17	144.43	73
S3-21	124.489	7	0.0004299	0.000435919	0.000435102	0.00041868	1.00188	1.03922	1.047	0.91	285.43	5	375.43	2	124.43	84
S3-22	126.75	7	0.0005391	0.000547402	0.000545246	0.000524652	1.00395	1.03925	1.048	0.813	61.43	0	331.43	4	156.43	86
S3-23	129.011	7	0.0005199	0.000528946	0.000527387	0.000503367	1.00296	1.04772	1.057	0.878	388.43	1	298.43	1	152.43	88
S3-24	131.273	7	0.0005429	0.000550392	0.000548166	0.000530142	1.00406	1.034	1.042	0.78	247.43	2	157.43	3	366.43	87
S3-25	133.534	7	0.0006069	0.000618735	0.000616489	0.000585476	1.00364	1.05297	1.064	0.869	219.43	1	309.43	2	88.43	88
S3-26	135.795	7	0.0006781	0.000691662	0.000680134	0.000662504	1.01695	1.02661	1.044	0.221	397.43	2	307.43	10	141.43	80
S3-27	138.057	7	0.0007955	0.00080958	0.000803932	0.000773067	1.00703	1.03993	1.051	0.697	360.43	6	269.43	8	128.43	80
S3-28	140.318	7	0.0005443	0.000553444	0.000548437	0.000530965	1.00913	1.03291	1.045	0.562	406.43	4	315.43	11	153.43	78
S3-29	142.58	7	0.0007951	0.000805754	0.000800109	0.000779437	1.00706	1.02652	1.036	0.574	54.43	2	324.43	7	161.43	83
S3-30	144.841	7	0.000979	0.000991042	0.000984287	0.000961672	1.00686	1.02352	1.032	0.548	407.43	1	317.43	10	140.43	80
S3-31	147.102	7	0.0006453	0.00065285	0.000650204	0.000632846	1.00407	1.02743	1.034	0.734	374.43	8	283.43	4	167.43	81
S3-32	149.364	7	0.0005485	0.000555685	0.000550913	0.000538956	1.00866	1.02219	1.032	0.438	394.43	1	304.43	0	204.43	89
S3-33	151.625	7	0.0005585	0.000566151	0.000564811	0.000544537	1.00237	1.03723	1.045	0.878	257.43	4	347.43	1	89.43	86
NS3-34	153.886	7	0.0005501	0.000558517	0.000554391	0.000537393	1.00744	1.03163	1.042	0.614	230.43	5	139.43	2	386.43	84
S3-35	156.148	7	0.000559	0.000565261	0.000560006	0.000551789	1.00938	1.01489	1.025	0.226	215.43	14	305.43	0	396.43	76
S3-36	158.409	7	0.0005764	0.000582395	0.000576515	0.000570233	1.0102	1.01102	1.021	0.038	271.43	20	167.43	34	386.43	49
S3-37	160.67	7	0.0005519	0.000556039	0.000555543	0.000544118	1.00089	1.021	1.025	0.92	211.43	8	302.43	7	72.43	80
S3-38	162.932	7	0.00057	0.000579348	0.000573819	0.000556833	1.00964	1.0305	1.042	0.518	227.43	2	317.43	3	99.43	86
S3-39	165.193	7	0.0005536	0.000561959	0.000558915	0.000539926	1.00545	1.03517	1.044	0.73	188.43	1	279.43	11	91.43	79
S3-40	167.455	7	0.0005004	0.000507306	0.000505754	0.00048814	1.00307	1.03608	1.044	0.843	197.43	2	107.43	1	363.43	88
S3-41	169.716	7	0.0004738	0.000480623	0.000478964	0.000461813	1.00346	1.03714	1.045	0.823	385.43	1	295.43	7	124.43	83
S3-42	171.977	7	0.0004938	0.000500861	0.000499726	0.000480813	1.00227	1.03934	1.047	0.889	229.43	8	319.43	1	54.43	82
S3-43	174.239	7	0.0004901	0.00049755	0.000494707	0.000478044	1.00575	1.03486	1.044	0.713	252.43	12	161.43	3	56.43	78
S3-44	176.5	7	0.0006865	0.000695974	0.000693571	0.000669955	1.00346	1.03525	1.043	0.814	229.43	15	320.43	4	64.43	75
S4-1	179.25	7	0.0006244	0.000631144	0.000628521	0.000613535	1.00417	1.02443	1.031	0.71	155.43	1	245.43	1	378.43	89
S4-2	181.5	7	0.0005604	0.000566676	0.000563874	0.000550649	1.00497	1.02402	1.031	0.651	321.43	2	231.43	5	75.43	84
S4-3	183.75	7	0.0005474	0.000554899	0.000550137	0.000537164	1.00866	1.02415	1.034	0.471	244.43	2	154.43	2	378.43	87
S4-4	186	7	0.0004961	0.0005024	0.000496398	0.000489551	1.01209	1.01399	1.026	0.075	265.43	5	174.43	8	389.43	80
S4-5	188.25	7	0.0004824	0.000486259	0.00048515	0.000475791	1.00229	1.01967	1.024	0.795	309.43	13	217.43	10	91.43	74
S4-6	190.5	7	0.0005041	0.000511309	0.000507629	0.000493312	1.00725	1.02902	1.039	0.597	215.43	1	305.43	2	104.43	88
S4-7	192.75	7	0.0004671	0.000473546	0.000470463	0.000457291	1.00655	1.0288	1.038	0.627	385.43	8	294.43	5	174.43	81
S4-8	195	7	0.0005103	0.00051724	0.000516628	0.000497032	1.00118	1.03943	1.046	0.94	233.43	0	323.43	4	137.43	86
S4-9	197.25	7	0.0005756	0.000583543	0.000577154	0.000566103	1.01107	1.01952	1.031	0.277	233.43	3	323.43	9	123.43	81
S4-10	199.5	7	0.0005809	0.000592692	0.000585489	0.000564519	1.0123	1.03715	1.052	0.496	220.43	1	310.43	8	122.43	82
S4-11	201.75	7	0.0006299	0.000639978	0.000636703	0.000613019	1.00514	1.03864	1.048	0.761	388.43	1	298.43	6	129.43	84
S4-12	204	7	0.0006696	0.000680113	0.000674622	0.000654065	1.00814	1.03143	1.042	0.584	222.43	5	131.43	7	349.43	81
S4-13	206.25	7	0.0006654	0.000674716	0.000663071	0.000658413	1.01756	1.00707	1.026	-0.42	248.43	3	338.43	5	130.43	84
S4-14	208.5	7	0.0007208	0.000729522	0.000726927	0.000705952	1.00357	1.02971	1.037	0.786	212.43	5	303.43	6	86.43	82
S4-15	210.75	7	0.0005722	0.00058393	0.000581126	0.000551601	1.00483	1.05353	1.065	0.832	214.43	2	124.43	3	343.43	86
S4-16	213	7	0.0004863	0.000496415	0.000483674	0.000478811	1.02634	1.01016	1.038	-0.439	189.43	3	280.43	19	91.43	71
S4-17	215.25	7	0.0003386	0.000343137	0.000342088	0.000330609	1.00307	1.03472	1.042	0.835	78.43	1	348.43	6	183.43	84
S4-18	217.5	7	0.0003756	0.000382812	0.000381685	0.000362266	1.00295	1.0536	1.064	0.893	241.43	1	331.43	7	143.43	83
S4-19	219.75	7	0.0004124	0.000419328	0.000416936	0.000400935	1.00574	1.03991	1.05	0.748	238.43	2	328.43	7	129.43	83
S4-20	222	7	0.0004641	0.000473568	0.000468787	0.000449945	1.0102	1.04188	1.056	0.606	250.43	5	341.43	12	139.43	77
S4-21	224.25	7	0.0004766	0.000483034	0.000481509	0.000465257	1.00317	1.03493	1.042	0.832	183.43	10	273.43	2	374.43	80
S4-22	226.5	7	0.0004736	0.000480941	0.000479615	0.000460244	1.00276	1.04209	1.051	0.876	244.43	4	335.43	5	118.43	83
S4-23	228.75	7	0.0005177	0.000526553	0.000518528	0.000508019	1.01548	1.02069	1.037	0.143	362.43	1	271.43	10	97.43	80
S4-24	231	7	0.0005167	0.000522539	0.000520834	0.000506728	1.00327	1.02784	1.034	0.79	182.43	1	272.43	2	66.43	87
S4-25	233.25	7	0.000544	0.000552106	0.000548352	0.000531542	1.00685	1.03162	1.041	0.641	225.43	4	135.43	3	365.43	85
S4-26	235.5	7	0.0005538	0.000560556	0.000557344	0.000543499	1.00576	1.02547	1.033	0.632	218.43	9	128.43	4	377.43	80
S4-27	237.75	7	0.0006033	0.000609695	0.000607885	0.00059232	1.00298	1.02628	1.032	0.793	215.43	4	306.43	6	93.43	83
S4-28	240	7	0.0006331	0.000643546	0.000633733	0.000622021	1.01548	1.01883	1.035	0.095	233.43	5	323.43	4	94.43	84
S4-29	242.25	7	0.0006304	0.000638343	0.00063393	0.00061899	1.00696	1.02414	1.033	0.548	208.43	5	300.43	14	99.43	75
S4-30	244.5	7	0.0006636	0.000674748	0.000670966	0.000645152	1.00564	1.04001	1.05	0.749	230.43	7	320.43	1	54.43	83
S4-31	246.75	7	0.0006262	0.000635217	0.000630646	0.000612737	1.00725	1.02923	1.039	0.598	215.43	4	306.43	4	86.43	84
S4-32	249	7	0.0004947	0.000500043	0.000495788	0.000488269	1.00858	1.0154	1.024	0.285	228.43	3	318.43	1	64.43	87
S4-33	251.25	7	0.0004806	0.000485166	0.000483243	0.000473391	1.00398	1.02081	1.027	0.677	204.43	13	114.43	0	384.43	77
S4-34	253.5	7	0.0005134	0.00052028	0.000517867	0.000502054	1.00466	1.0315	1.04	0.739	329.43	1	59.43	6	227.43	84
S4-35	255.75	7	0.0004945	0.000501027	0.000497319	0.000485203	1.00746	1.02497	1.034	0.535	211.43	7	302.43	3	54.43	82
S4-36	258	7	0.0005179	0.000525306	0.000520697	0.000507646	1.00885	1.02571	1.036	0.484	213.43	7	123.43	1	386.43	83
S4-37	260.25	7	0.000509	0.000516279	0.000512105	0.000498616	1.00815	1.02705	1.037	0.533	230.43	5	320.43	5	92.43	83
S4-38	262.5	7	0.0004992	0.00050539	0.000501197	0.000490963	1.00837	1.02084	1.03	0.426	243.43	4	153.43	3	390.43	85
S4-39	264.75	7	0.0004922	0.000496482	0.000493824	0.000486294	1.00538	1.01548	1.022	0.486	231.43	4	141.43	1	396.43	86
S4-40	267	7	0.000491	0.000495517	0.000492031	0.000485403	1.00708	1.01365	1.021	0.314	243.43	5	153.43	4	385.43	84
S4-41	269.25	7	0.0004701	0.00047466	0.000472262	0.000463378	1.00508	1.01917	1.026	0.581	295.43	6	387.43	14	181.43	75
S4-42	271.5	7	0.0004751	0.000481704	0.000477095	0.000466501	1.00966	1.02271	1.034	0.404	203.43	1	293.43	2	92.43	88
S4-43	273.75	7	0.0004758	0.000482033	0.000479321	0.000466094	1.00566	1.02838	1.037	0.663	236.43	6	146.43	0	55.43	84
S4-44	276	7	0.0004674	0.000472401	0.000468802	0.000460997	1.00768	1.01693	1.025	0.38	220.43	7	130.43	3	379.43	83
S5-1	279.25	7	0.0004695	0.00047274	0.000469688	0.000466073	1.0065	1.00776	1.014	0.095	369.43	1	100.43	6	266.43	84
S5-2	281.5	7	0.0005181	0.000521519	0.000518774	0.000514007	1.00529	1.00927	1.015	0.276	230.43	6	320.43	1	58.43	84
S5-3	283.75	7	0.0005272	0.000532999	0.000529414	0.000519239	1.00677	1.0196	1.028	0.485	412.43	1	142.43	5	312.43	85
S5-4	286	7	0.0005671	0.000574813	0.000569198	0.000557289	1.00986	1.02137	1.032	0.368	231.43	8	321.43	1	57.43	82
S5-5	288.25	7	0.0005629	0.000568867	0.000565152	0.000554682	1.00657	1.01888	1.027	0.48	254.43	4	163.43	14	360.43	76
S5-6	290.5	7	0.0005684	0.000573743	0.000569764	0.000561693	1.00698	1.01437	1.022	0.34	234.43	4	325.43	8	114.43	81
S5-7	292.75	7	0.0005682	0.000577291	0.000566893	0.000560416	1.01834	1.01156	1.03	-0.225	250.43	3	340.43	9	143.43	81
S5-8	295	7	0.0005293	0.000536763	0.000532529	0.000518608	1.00795	1.02684	1.037	0.539	59.43	4	329.43	1	232.43	86
S5-9	297.25	7	0.0005678	0.000576317	0.000572513	0.00055457	1.00664	1.03235	1.042	0.654	238.43	2	328.43	6	129.43	84
S5-10	299.5	7	0.0005395	0.000548186	0.000543115	0.000527199	1.00934	1.03019	1.042	0.524	229.43	16	323.43	13	91.43	69
S5-11	301.75	7	0.0005308	0.000537063	0.000533295	0.000521989	1.00707	1.02166	1.03	0.503	254.43	17	163.43	3	62.43	72
S5-12	304	7	0.0004848	0.000492751	0.000488048	0.000473601	1.00964	1.0305	1.042	0.515	246.43	6	337.43	4	99.43	82
S5-13	306.25	7	0.0004494	0.000455467	0.000451512	0.000441221	1.00876	1.02332	1.033	0.448	270.43	11	179.43	3	72.43	78
S5-14	308.5	7	0.000492	0.000501053	0.000499823	0.000475124	1.00246	1.05198	1.062	0.905	280.43	6	371.43	15	167.43	74
S5-15	310.75	7	0.0005075	0.000517244	0.000511509	0.000493747	1.01121	1.03597	1.05	0.522	215.43	6	306.43	8	89.43	80
S5-16	313	7	0.0005346	0.000544383	0.0005346	0.000524817	1.0183	1.01864	1.037	0.009	234.43	3	324.43	5	110.43	84
S5-17	315.25	7	0.0005207	0.000529396	0.000524501	0.000508151	1.00933	1.03218	1.044	0.547	225.43	3	315.43	3	87.43	86
S5-18	317.5	7	0.0005578	0.000566892	0.00056349	0.000543074	1.00604	1.03759	1.048	0.718	217.43	2	126.43	1	365.43	87
S5-19	319.75	7	0.0005349	0.000541854	0.000540142	0.000522704	1.00317	1.03336	1.041	0.823	355.43	1	265.43	4	94.43	86
S5-20	322	7	0.0005308	0.000540195	0.000537435	0.00051477	1.00514	1.04403	1.054	0.789	408.43	0	318.43	2	150.43	88
S5-21	324.25	7	0.0005675	0.000578282	0.000569259	0.000554958	1.01585	1.02577	1.042	0.233	218.43	3	308.43	4	91.43	85
S5-22	326.5	7	0.0005521	0.00055994	0.000555689	0.000540616	1.00765	1.02788	1.038	0.567	232.43	2	323.43	6	122.43	84
S5-23	328.75	7	0.0005422	0.000549194	0.00054849	0.00052897	1.00128	1.0369	1.044	0.934	209.43	3	300.43	4	85.43	85
S5-24	331	7	0.000523	0.000529799	0.00052823	0.000510971	1.00297	1.03378	1.041	0.839	259.43	4	169.43	3	401.43	85
S5-25	333.25	7	0.0005061	0.000514856	0.000512527	0.000490917	1.00454	1.04402	1.054	0.81	409.43	0	319.43	2	140.43	88
S5-26	335.5	7	0.0005082	0.00051562	0.000512977	0.000496054	1.00515	1.03412	1.043	0.734	241.43	3	331.43	2	95.43	86
S5-27	337.75	7	0.0005162	0.000525027	0.00052131	0.000502263	1.00713	1.03792	1.049	0.678	72.43	3	342.43	8	181.43	81
S5-28	340	7	0.0005224	0.00052893	0.000523393	0.000514877	1.01058	1.01654	1.028	0.215	208.43	4	299.43	16	104.43	74
S5-29	342.25	7	0.000526	0.000532785	0.000531839	0.000513376	1.00178	1.03596	1.043	0.907	264.43	7	173.43	1	79.43	83
S5-30	344.5	7	0.0005202	0.000527483	0.000524778	0.000508339	1.00515	1.03234	1.041	0.724	245.43	3	335.43	3	108.43	86
S5-31	346.75	7	0.0005267	0.000534969	0.000532125	0.000513006	1.00534	1.03727	1.047	0.747	400.43	1	310.43	5	138.43	85
S5-32	349	7	0.0005246	0.000532994	0.00052822	0.000512587	1.00904	1.0305	1.042	0.536	240.43	1	150.43	2	365.43	88
S5-33	351.25	7	0.0005022	0.000510788	0.000508026	0.000487737	1.00544	1.0416	1.052	0.765	238.43	4	328.43	1	76.43	85
S5-34	353.5	7	0.0005107	0.000518871	0.000514683	0.000498545	1.00814	1.03237	1.043	0.596	227.43	1	317.43	5	130.43	85
S5-35	355.75	7	0.0005043	0.000512167	0.000508637	0.000492146	1.00694	1.03351	1.044	0.652	230.43	3	320.43	0	55.43	87
S5-36	358	7	0.0005184	0.000526383	0.000523532	0.000505284	1.00545	1.03611	1.045	0.737	238.43	5	329.43	2	81.43	85
S5-37	360.25	7	0.0005399	0.000547998	0.000542977	0.000528724	1.00925	1.02696	1.038	0.488	254.43	3	344.43	1	89.43	87
S5-38	362.5	7	0.0005447	0.000553088	0.000548513	0.000532444	1.00834	1.03018	1.041	0.564	217.43	0	308.43	4	122.43	86
S5-39	364.75	7	0.0005556	0.000561989	0.000553322	0.000551489	1.01566	1.00332	1.02	-0.648	60.43	9	152.43	7	281.43	79
S5-40	367	7	0.0006138	0.000624173	0.000619508	0.000597718	1.00753	1.03646	1.047	0.654	190.43	1	280.43	6	87.43	84
S5-41	369.25	7	0.0005992	0.000613461	0.000607888	0.000576251	1.00917	1.0549	1.07	0.71	236.43	4	146.43	1	407.43	86
S5-42	371.5	7	0.0006284	0.000640277	0.000634558	0.000610365	1.00901	1.03964	1.052	0.623	198.43	3	289.43	12	93.43	78
S5-43	373.75	7	0.0005788	0.000591649	0.000585514	0.000559294	1.01048	1.04688	1.062	0.63	220.43	11	130.43	1	394.43	79
S5-44	376	7	0.0005477	0.000561831	0.000552848	0.000528421	1.01625	1.04623	1.066	0.474	242.43	9	152.43	0	59.43	81
S6-1	379.28	7	0.0004834	0.000491183	0.000488814	0.000470203	1.00485	1.03958	1.049	0.781	52.43	7	143.43	5	266.43	82
S6-2	381.561	7	0.0004394	0.000448803	0.000444717	0.00042468	1.00919	1.04718	1.061	0.669	385.43	3	295.43	4	151.43	85
S6-3	383.841	7	0.0005271	0.00053411	0.000528734	0.000518508	1.01017	1.01972	1.031	0.317	271.43	8	363.43	13	151.43	75
S6-4	386.122	7	0.0004177	0.000424383	0.000420875	0.000407842	1.00834	1.03196	1.043	0.585	260.43	4	351.43	0	85.43	86
S6-5	388.402	7	0.0004123	0.000419598	0.00041498	0.000402322	1.01113	1.03146	1.045	0.475	222.43	3	312.43	4	95.43	86
S6-6	390.683	7	0.00038	0.000386802	0.00038475	0.000368448	1.00533	1.04425	1.055	0.782	393.43	0	123.43	1	293.43	89
S6-7	392.963	7	0.0003104	0.000316639	0.000314497	0.000300064	1.00681	1.0481	1.06	0.747	401.43	0	311.43	12	131.43	78
S6-8	395.244	7	0.0003788	0.000387815	0.000384671	0.000363913	1.00817	1.05704	1.072	0.744	356.43	15	266.43	2	169.43	75
S6-9	397.524	7	0.0003935	0.000401449	0.000399639	0.000379373	1.00453	1.05342	1.065	0.841	393.43	3	303.43	8	141.43	82
S6-10	399.805	7	0.0003987	0.000406315	0.000402647	0.000387098	1.00911	1.04017	1.053	0.626	232.43	2	142.43	1	399.43	88
S6-11	402.085	7	0.0003864	0.000393896	0.000390689	0.000374653	1.00821	1.0428	1.055	0.675	241.43	5	150.43	2	395.43	85
S6-12	404.366	7	0.0003668	0.000372375	0.000370982	0.000357043	1.00375	1.03904	1.048	0.822	255.43	1	345.43	1	108.43	89
S6-13	406.646	7	0.0003975	0.000404576	0.000401634	0.000386291	1.00733	1.03972	1.051	0.688	200.43	2	290.43	1	402.43	88
S6-14	408.927	7	0.0004261	0.000434409	0.000433855	0.000410036	1.00128	1.05809	1.068	0.957	381.43	1	111.43	2	256.43	88
S6-15	411.207	7	0.0004324	0.000439275	0.000437156	0.000420812	1.00485	1.03884	1.048	0.776	229.43	5	319.43	3	83.43	85
S6-16	413.488	7	0.0004579	0.000464997	0.000462845	0.000445903	1.00465	1.03799	1.047	0.78	231.43	5	321.43	5	92.43	83
S6-17	415.768	7	0.0004527	0.000459309	0.000457136	0.000441654	1.00475	1.03505	1.044	0.756	224.43	7	134.43	0	404.43	83
S6-18	418.049	7	0.0004605	0.000467407	0.000464737	0.000449356	1.00575	1.03423	1.043	0.71	216.43	6	126.43	1	389.43	84
S6-19	420.329	7	0.0004884	0.000494896	0.000492893	0.000477411	1.00406	1.03243	1.04	0.774	203.43	7	293.43	4	412.43	82
S6-20	422.61	7	0.0005259	0.000535208	0.000530633	0.000511858	1.00862	1.03668	1.048	0.617	239.43	8	149.43	2	402.43	82
S6-21	424.89	7	0.0005512	0.000558641	0.000556767	0.000538192	1.00337	1.03451	1.042	0.817	211.43	10	301.43	1	396.43	80
S6-22	427.171	7	0.0005667	0.000577184	0.000571687	0.000551229	1.00962	1.03711	1.05	0.585	223.43	6	133.43	0	399.43	84
S6-23	429.451	7	0.0005655	0.000580203	0.000565896	0.000550401	1.02528	1.02815	1.054	0.054	401.43	2	310.43	22	137.43	68
S6-24	431.732	7	0.0005374	0.000549169	0.000540786	0.000522245	1.0155	1.0355	1.053	0.385	226.43	2	316.43	11	127.43	79
S6-25	434.012	7	0.0006259	0.000639858	0.000629781	0.000608062	1.016	1.03572	1.054	0.376	233.43	5	325.43	21	130.43	69
S6-26	436.293	7	0.0006498	0.000660522	0.000656493	0.000632385	1.00614	1.03812	1.048	0.72	58.43	0	328.43	15	149.43	75
S6-27	438.573	7	0.0006614	0.000673239	0.000663583	0.000647378	1.01455	1.02503	1.04	0.261	248.43	3	339.43	10	141.43	79
S6-28	440.854	7	0.0005529	0.000567386	0.000556494	0.000534765	1.01957	1.04063	1.062	0.346	246.43	1	336.43	2	128.43	88
S6-29	443.134	7	0.0005107	0.000523927	0.000516879	0.000491293	1.01364	1.05208	1.07	0.58	217.43	3	308.43	17	116.43	73
S6-30	445.415	7	0.0005128	0.000528902	0.000523107	0.000486391	1.01108	1.07549	1.095	0.737	236.43	4	146.43	3	379.43	85
S6-31	447.695	7	0.0004148	0.000422972	0.000421437	0.000399992	1.00364	1.05361	1.064	0.87	223.43	2	313.43	0	403.43	88
S6-32	449.976	7	0.000339	0.000345373	0.00034378	0.000327847	1.00463	1.0486	1.059	0.822	243.43	0	333.43	10	153.43	80
S6-33	452.256	7	0.0005038	0.000515942	0.000512163	0.000483346	1.00738	1.05962	1.074	0.775	238.43	2	329.43	11	140.43	79
S6-34	454.537	7	0.00048	0.000488352	0.000485184	0.000466464	1.00653	1.04013	1.051	0.715	389.43	0	299.43	5	125.43	85
S6-35	456.817	7	0.0005341	0.000543073	0.000540296	0.000518932	1.00514	1.04117	1.051	0.771	229.43	1	319.43	2	115.43	88
S6-36	459.098	7	0.0005549	0.000563223	0.000559783	0.000541693	1.00615	1.0334	1.043	0.69	339.43	4	249.43	1	147.43	86
S6-37	461.378	7	0.0005337	0.000541705	0.000536635	0.000522759	1.00945	1.02654	1.038	0.47	178.43	6	268.43	1	371.43	84
S6-38	463.659	7	0.0006027	0.000615357	0.000603785	0.000589019	1.01917	1.02507	1.045	0.132	253.43	0	163.43	4	350.43	86
S6-39	465.939	7	0.0006135	0.000624543	0.000621905	0.000594052	1.00424	1.04689	1.057	0.832	245.43	4	335.43	0	67.43	86
S6-40	468.22	7	0.0006719	0.000682382	0.000678081	0.000655237	1.00634	1.03486	1.045	0.69	223.43	0	133.43	4	313.43	86
S6-41	470.5	7	0.0006428	0.000653085	0.000649228	0.000626151	1.00594	1.03686	1.047	0.718	231.43	4	321.43	1	62.43	86
